# Supplementary material for: Laser induced trace doping of Pd on Ru nanoparticles for an efficient hydrogen evolution electrocatalyst
Source: Royal Society of Chemistry journal article supplement (doi:10.1039/d2nr05457d), 2022-11-28
Supplement: d2nr05457d1.pdf [file d2nr05457d1.pdf]

## Supplementary Information

### **Laser induced trace doping of Pd on Ru nanoparticles for efficient hydrogen evolution electrocatalyst**

Ziang Guo,<sup>‡a</sup> Liye Zhu,<sup>‡a</sup> Xuan Liu,<sup>a,b,c,d</sup> Ran Zhang,<sup>a</sup> Tiying Zhu,<sup>a</sup> Nan Jiang,<sup>a</sup>  
Yan Zhao<sup>\*a,b,c,d</sup> and Yijian Jiang<sup>a,b,c,d</sup>

<sup>a</sup>Institute of Laser Engineering, Faculty of Materials and Manufacturing, Beijing University of Technology, Beijing 100124, People's Republic of China.

<sup>b</sup>Key Laboratory of Trans-scale Laser Manufacturing Technology (Beijing University of Technology), Ministry of Education, Beijing 100124, People's Republic of China.

<sup>c</sup>Beijing Engineering Research Center of Laser Technology, Beijing University of Technology, Beijing 100124, People's Republic of China.

<sup>d</sup>Beijing Colleges and Universities Engineering Research Center of Advanced Laser Manufacturing, Beijing 100124, People's Republic of China.

E-mail: zhaoyan@bjut.edu.cn

<sup>‡</sup>These authors contributed equally to this work

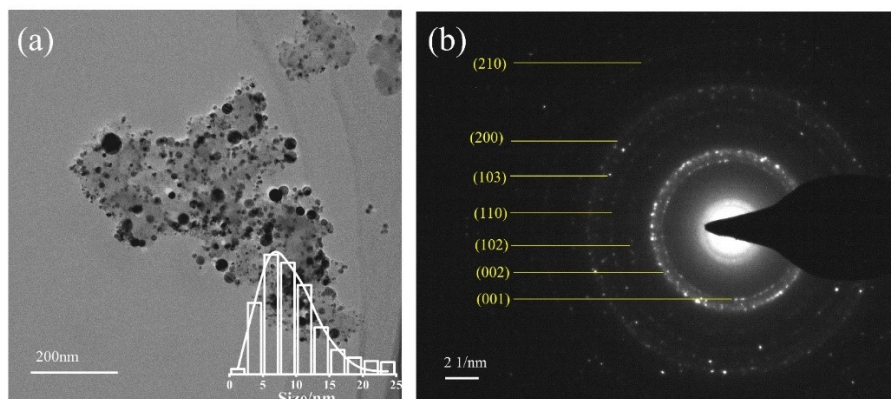

**Figure S1.** (a) TEM image of carbon-supported Pd-doped Ru NPs, (b) selected area electron diffraction (SAED) pattern of the Pd-doped Ru NPs.

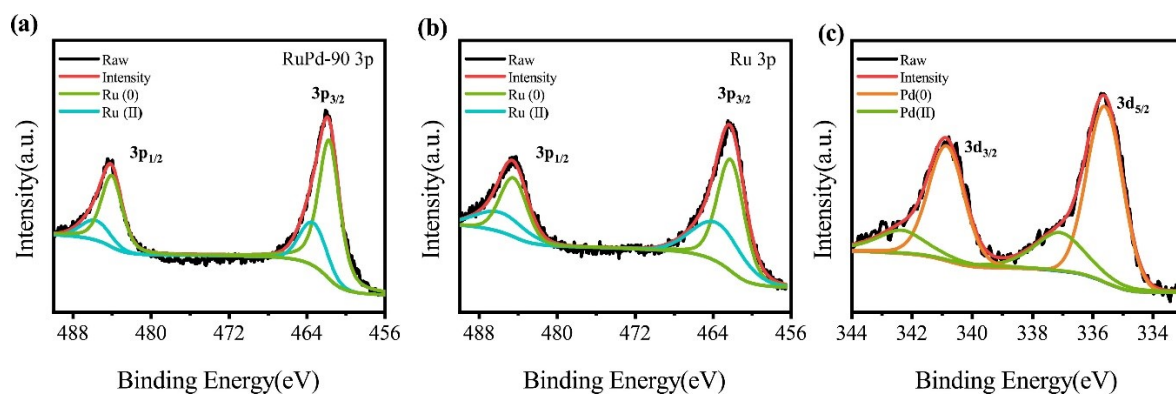

**Figure S2.** The valence distributions of (a) Ru 3p orbital and (c) Pd 3d orbital in RuPd-90, (b) Ru 3p orbital in isolated Ru NPs shown by XPS.

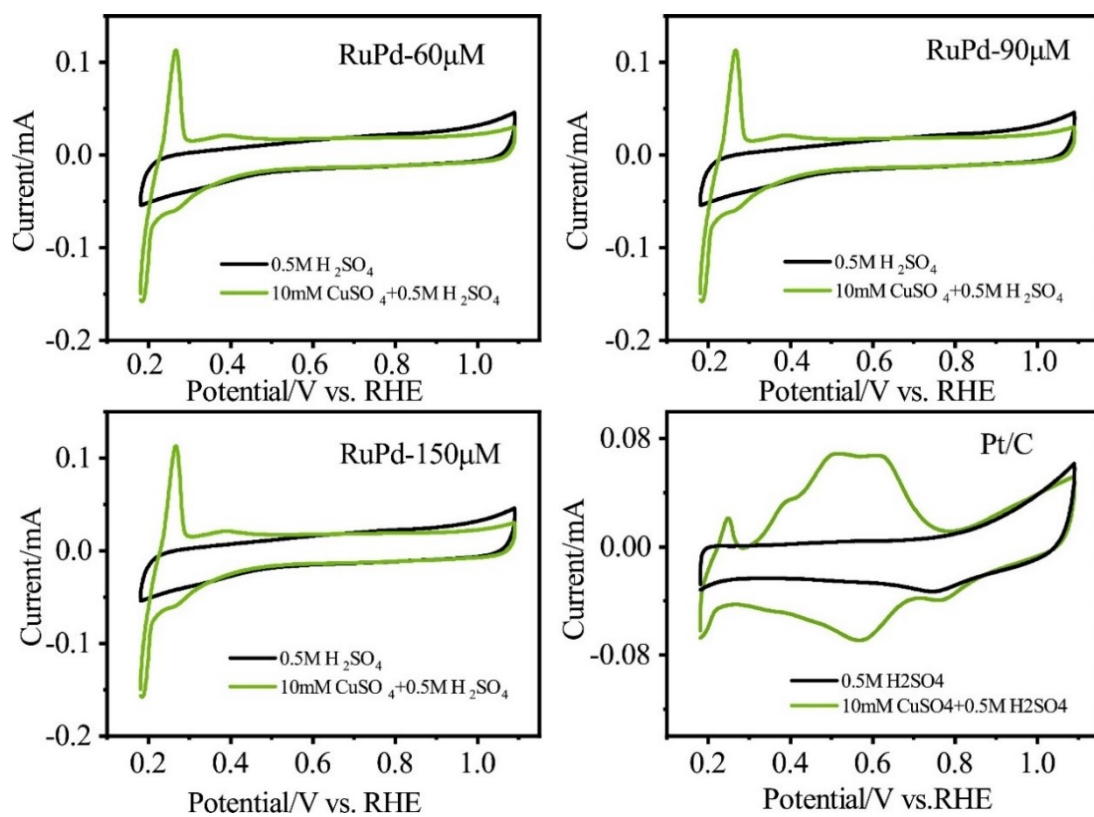

**Figure S3.** CV in different solutions on (a) RuPd-60; (b) RuPd-90; (c) RuPd-150; (d)Pt/C. Scan rate: 10 mV/s

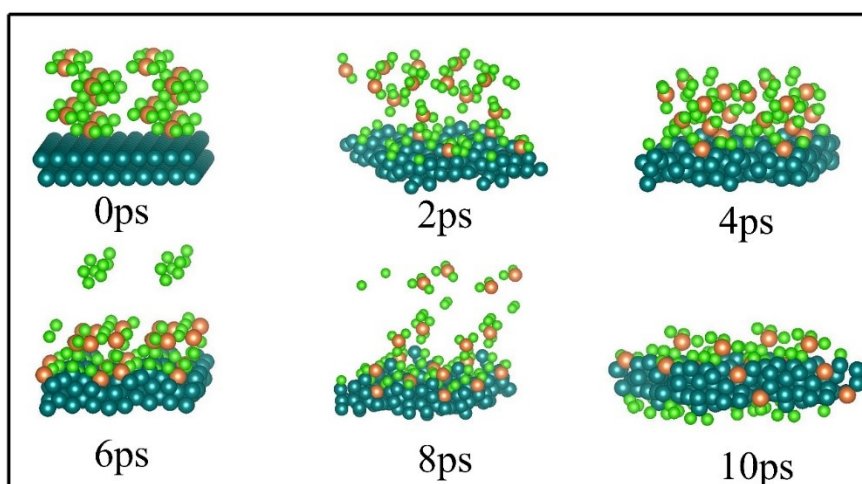

**Figure S4.** Snapshots of Pd doping carried out via MD simulation.

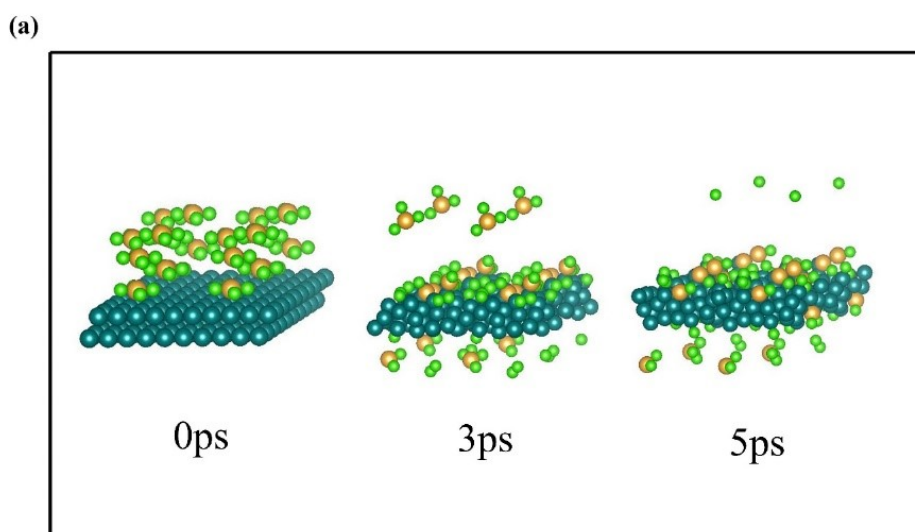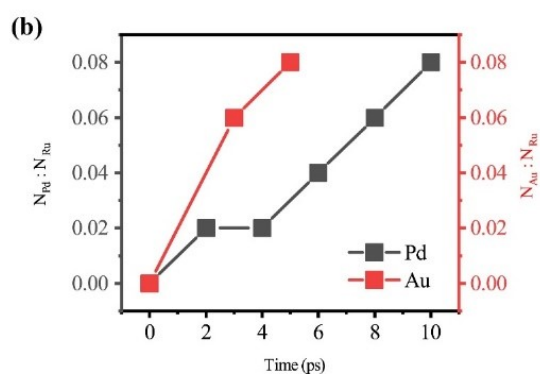

**Figure S5.** (a) Snapshots of Au doping carried out via MD simulation. (b) Doping ratio of Pd and Au embedded in Ru matrix at different times.

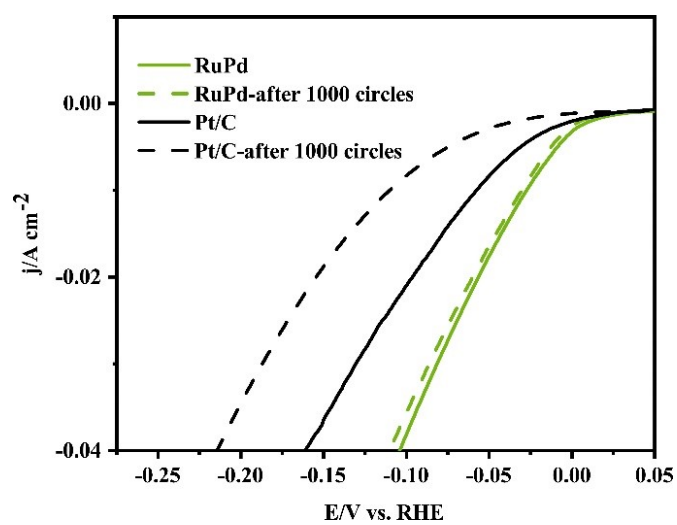

**Figure S6.** Durability test during the 1000 CV circles.

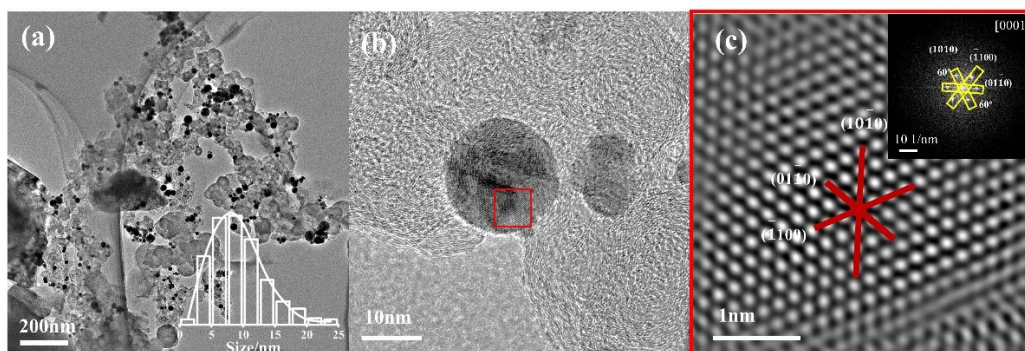

**Figure S7.** (a) TEM and (b) HRTEM images and its (c) FFT and inverse FFT images of RuPd-90 after the durability test.

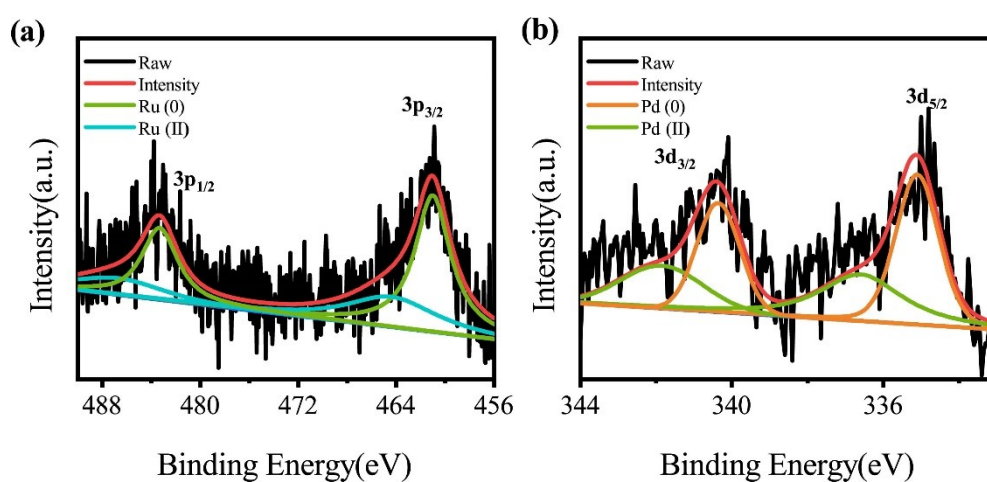

**Figure S8.** The valence distributions of (a) Ru and (b) Pd in RuPd-90 shown by XPS after the durability test.

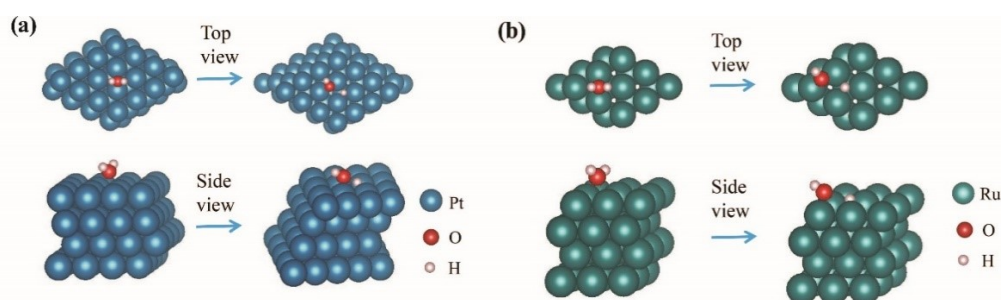

**Figure S9.** The splitting process of water molecules on atomic model of (a) Pt (111) and (b) Ru (001) facets.

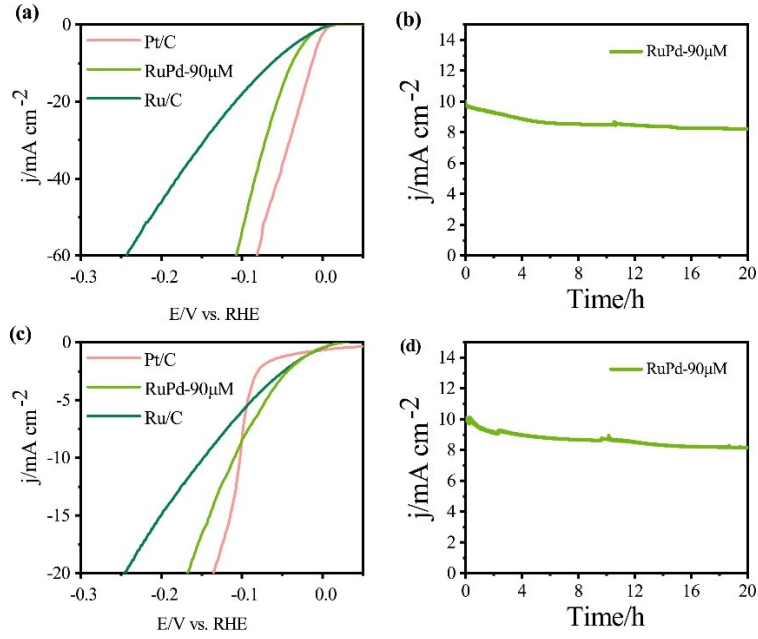

**Figure S10.** (a) LSV polarization curves with a scan rate of 5 mV/s and (b) CA curves recorded at an overpotential corresponding to the current density of 10 mA cm<sup>-2</sup> test in 0.5M H<sub>2</sub>SO<sub>4</sub>; (c) LSV and (d) CA curves test in 0.01M PBS.

**Table S1.** The list of measured overpotential values for different precursor concentrations.

| C <sub>H<sub>2</sub>PdCl<sub>4</sub></sub> (μM) | Test |      |      |      |      | average |
|-------------------------------------------------|------|------|------|------|------|---------|
|                                                 | 1    | 2    | 3    | 4    | 5    |         |
| 60                                              | 31mV | 30mV | 29mV | 29mV | 30mV | 30mV    |
| 90                                              | 27mV | 24mV | 28mV | 27mV | 29mV | 27mV    |
| 150                                             | 37mV | 37mV | 39mV | 37mV | 38mV | 37mV    |
| 200                                             | 49mV | 49mV | 49mV | 50mV | 49mV | 49mV    |
| 300                                             | 52mV | 50mV | 49mV | 50mV | 50mV | 50mV    |

**Table S2.** The list of measured m<sub>Ru</sub>:m<sub>Pd</sub> values for different precursor concentrations.

| C <sub>H<sub>2</sub>PdCl<sub>4</sub></sub> (μM) | Test |      |      | average |
|-------------------------------------------------|------|------|------|---------|
|                                                 | 1    | 2    | 3    |         |
| 60                                              | 21:1 | 18:1 | 19:1 | 19:1    |
| 90                                              | 15:1 | 17:1 | 15:1 | 15:1    |
| 150                                             | 13:1 | 12:1 | 12:1 | 12:1    |
| 200                                             | 9:1  | 9:1  | 8:1  | 9:1     |
| 300                                             | 8:1  | 9:1  | 8:1  | 8:1     |
